# Supplementary material for: Metal oxide arrays from block copolymer thin film templates
Source: Royal Society of Chemistry journal article supplement (doi:10.1039/c5ta00117j), 2015-01-01
Supplement: c5ta00117j1.pdf [file c5ta00117j1.pdf]

## Supplementary Information

### Metal Oxide Arrays from Block Copolymer Thin Film Templates

*Michael K. Mayeda,<sup>a</sup> Jeffery Hayat,<sup>b</sup> Thomas H. Epps, III,<sup>a\*</sup> and Jochen Lauterbach<sup>c\*</sup>*

<sup>a</sup> Department of Chemical & Biomolecular Engineering, University of Delaware, Newark, DE  
19716, USA

<sup>b</sup> Department of Chemistry & Biochemistry, University of South Carolina, Columbia, SC  
29201, USA

<sup>c</sup> Department of Chemical Engineering, University of South Carolina, Columbia, SC 29201,  
USA

\*E-mail: [thepps@udel.edu](mailto:thepps@udel.edu). Tel.: +1 302 831 0215. Fax: +1 302 831 1048

\*E-mail: [lauteraj@cec.sc.edu](mailto:lauteraj@cec.sc.edu). Tel.: +1 803 777 7904. Fax: +1 803 777 8292

## Methods for Sample Preparation

Table S1. Sample preparation methods prior to immersion and polymer removal.

| Description                          | Manuscript reference | Substrate                                  | Annealing procedure                 | Metal precursor solution                                                                                   |
|--------------------------------------|----------------------|--------------------------------------------|-------------------------------------|------------------------------------------------------------------------------------------------------------|
| PS- <i>b</i> -PEO                    | Figure 1a            | Si                                         | toluene vapor, 18 h                 | N/A                                                                                                        |
| PS- <i>b</i> -PEO                    | Figure 1b            | Si                                         | toluene/water vapor (98 % RH), 18 h | N/A                                                                                                        |
| EISA TiO <sub>2</sub>                | Figure 1c            | SiO <sub>2</sub>                           | toluene vapor, 2 h                  | 0.7 g titanium tetraisopropoxide, 0.25 g HCl solution (37% in water), 0.5 mL 2-propanol stirred for 30 min |
| SPICE TiO <sub>2</sub>               | Figure 1d            | SiO <sub>2</sub>                           | toluene/water vapor (98 % RH), 18 h | 0.7 g titanium tetraisopropoxide, 0.25 g HCl solution (37% in water), 0.5 mL 2-propanol                    |
| SPICE Au/TiO <sub>2</sub>            | Figure 1e            | SiO <sub>2</sub>                           | toluene/water vapor (98 % RH), 18 h | 0.7 g titanium tetraisopropoxide, 0.25 g HCl solution (37% in water), 0.5 mL 2-propanol stirred for 30 min |
| PS- <i>b</i> -PEO -Ti                | Figure 2a            | Transfer from SiO <sub>2</sub> to Cu grid  | toluene/water vapor (98 % RH), 2 h  | 0.7 g titanium tetraisopropoxide, 0.25 g HCl solution (37% in water), 0.5 mL 2-propanol stirred for 30 min |
| PS- <i>b</i> -PEO -Ti                | Figure 2b            | Transfer from SiO <sub>2</sub> to Cu grid  | toluene vapor, 2 h                  | 0.7 g titanium tetraisopropoxide, 0.25 g HCl solution (37% in water), 0.5 mL 2-propanol stirred for 30 min |
| SPICE TiO <sub>2</sub>               | Figure 2c            | Transfer from SiO <sub>2</sub> to SiN grid | toluene/water vapor (98 % RH), 18 h | 0.7 g titanium tetraisopropoxide, 0.25 g HCl solution (37% in water), 0.5 mL 2-propanol stirred for 30 min |
| SPICE MgO                            | Figure S1            | SiO <sub>2</sub>                           | toluene/water vapor (98 % RH), 18 h | 1 M in ethanol stirred for 30 min                                                                          |
| SPICE Al <sub>2</sub> O <sub>3</sub> | Figure S1            | SiO <sub>2</sub>                           | toluene/water vapor (98 % RH), 18 h | 1 M in ethanol stirred for 30 min                                                                          |
| SPICE MnO <sub>2</sub>               | Figure S1            | SiO <sub>2</sub>                           | toluene/water vapor (98 % RH), 18 h | 1 M in ethanol stirred for 30 min                                                                          |

|                                      |           |                  |                                     |                                                              |
|--------------------------------------|-----------|------------------|-------------------------------------|--------------------------------------------------------------|
| SPICE Fe <sub>2</sub> O <sub>3</sub> | Figure S1 | SiO <sub>2</sub> | toluene/water vapor (98 % RH), 18 h | 1 M in ethanol stirred for 30 min                            |
| SPICE Co <sub>3</sub> O <sub>4</sub> | Figure S1 | SiO <sub>2</sub> | toluene/water vapor (98 % RH), 18 h | 1 M in ethanol stirred for 30 min                            |
| SPICE NiO                            | Figure S1 | SiO <sub>2</sub> | toluene/water vapor (98 % RH), 18 h | 1 M in ethanol stirred for 30 min                            |
| SPICE CuO                            | Figure S1 | SiO <sub>2</sub> | toluene/water vapor (98 % RH), 18 h | 1 M in ethanol stirred for 30 min                            |
| SPICE ZnO                            | Figure S1 | SiO <sub>2</sub> | toluene/water vapor (98 % RH), 18 h | 1 M in ethanol stirred for 30 min                            |
| SPICE ZrO <sub>2</sub>               | Figure S1 | SiO <sub>2</sub> | toluene/water vapor (98 % RH), 18 h | 0.5 M in 50:50 vol ethanol:water solution stirred for 30 min |
| SPICE RuO <sub>2</sub>               | Figure S1 | SiO <sub>2</sub> | toluene/water vapor (98 % RH), 18 h | 1 M in ethanol stirred for 30 min                            |
| SPICE SnO <sub>2</sub>               | Figure S1 | SiO <sub>2</sub> | toluene/water vapor (98 % RH), 18 h | 1 M in ethanol stirred for 30 min                            |
| SPICE Ce <sub>2</sub> O <sub>3</sub> | Figure S1 | SiO <sub>2</sub> | toluene/water vapor (98 % RH), 18 h | 1 M in ethanol stirred for 30 min                            |

## Atomic Force Microscopy (AFM) of Metal Oxides

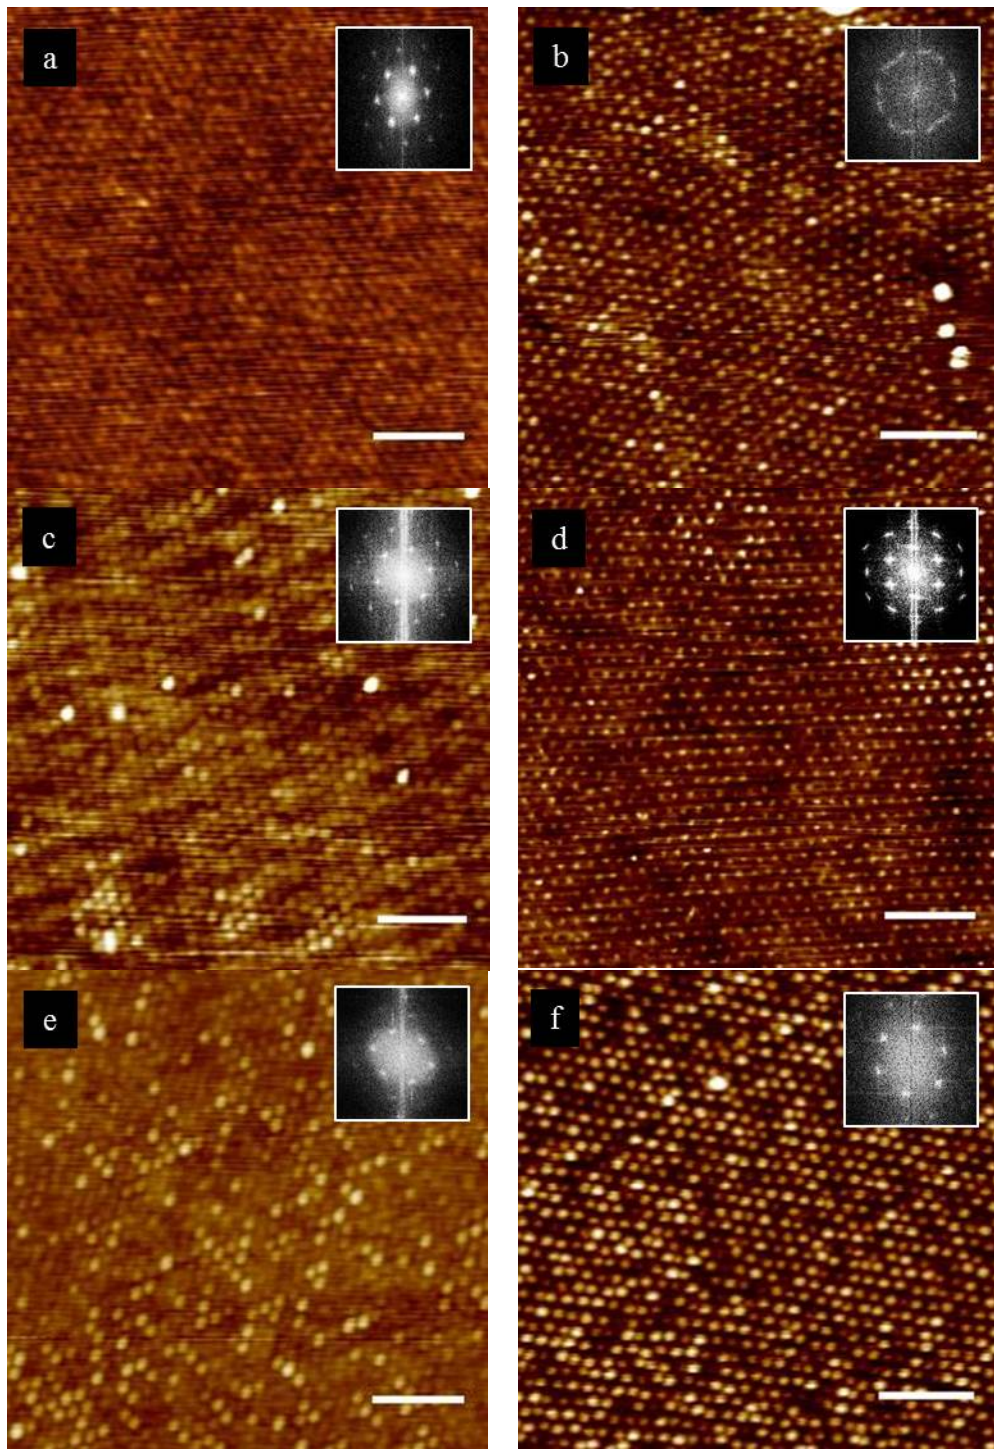

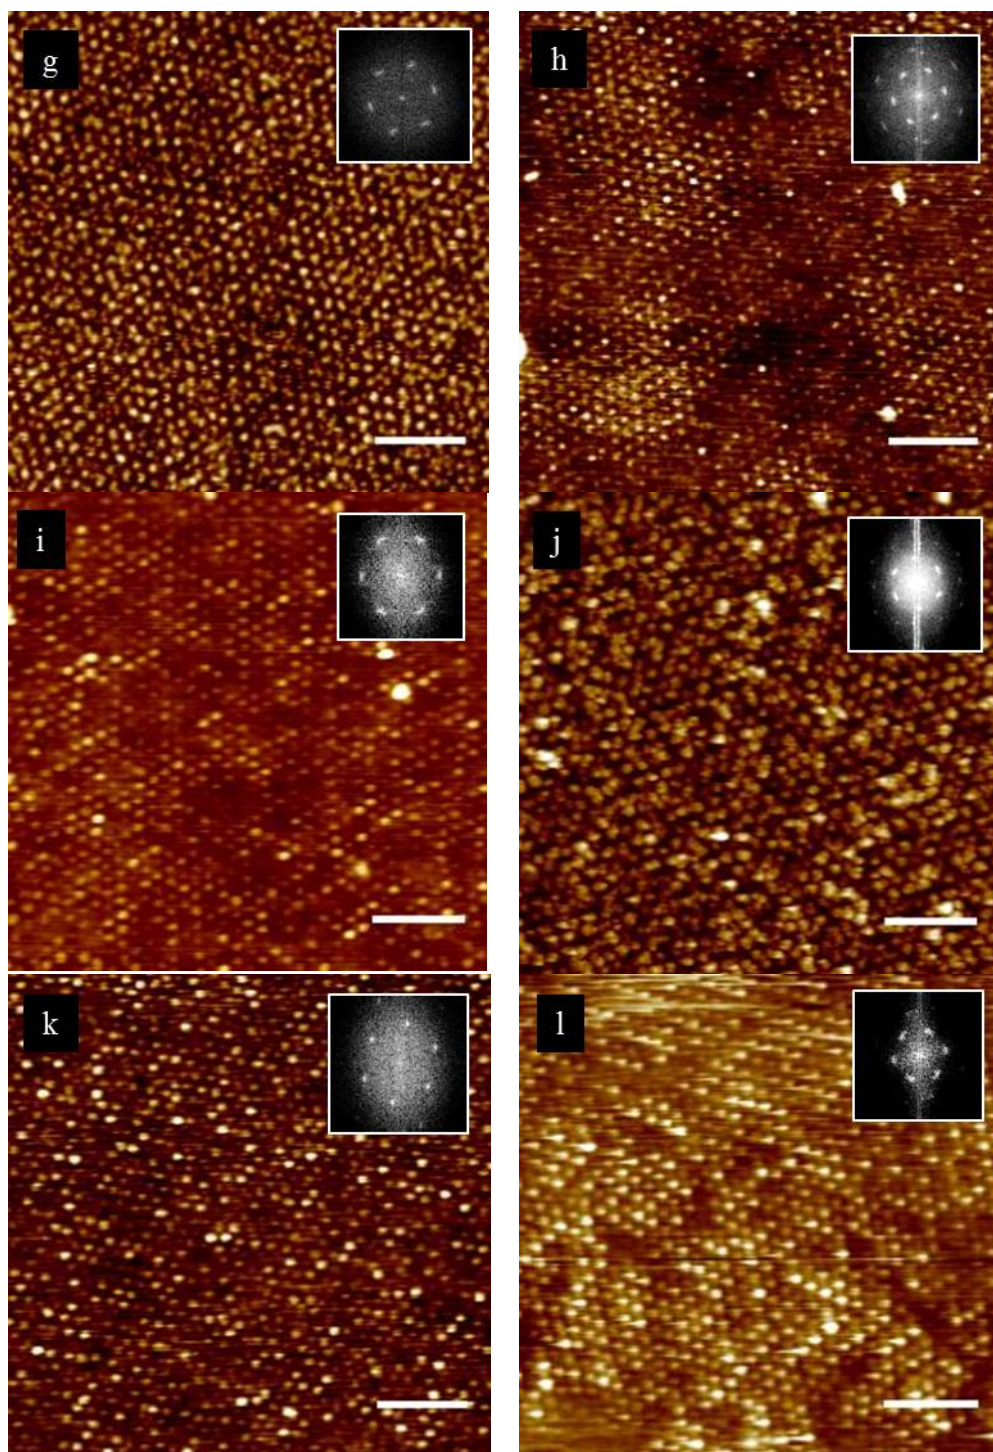

**Figure S1.** AFM height images of metal oxides templated by the SPICE method: (a) MgO, (b) Al<sub>2</sub>O<sub>3</sub>, (c) MnO<sub>2</sub>, (d) Fe<sub>2</sub>O<sub>3</sub>, (e) Co<sub>3</sub>O<sub>4</sub>, (f) NiO, (g) CuO, (h) ZnO, (i) ZrO<sub>2</sub>, (j) SnO<sub>2</sub>, (k) Ce<sub>2</sub>O<sub>3</sub>, and (l) RuO<sub>2</sub>. Insets are FFTs of the entire image. Scale bars represent 200 nm.

The SPICE method was used to template MgO, Al<sub>2</sub>O<sub>3</sub>, MnO<sub>2</sub>, Fe<sub>2</sub>O<sub>3</sub>, Co<sub>3</sub>O<sub>4</sub>, NiO, CuO, ZnO, ZrO<sub>2</sub>, SnO<sub>2</sub>, Ce<sub>2</sub>O<sub>3</sub>, and RuO<sub>2</sub>. TiO<sub>2</sub> is shown in the main text of the manuscript. Representative AFM height images are shown in Figure S1. FFTs of the image are shown in the insets. The 6-spot pattern is characteristic of hexagonal packing.

### XPS of Metal Oxides

**Table S1.** XPS peak positions and associated full width half maxima (FWHM).

| Metal oxide                                                                                      | Position (eV)                    | FWHM (eV)                | Metal oxide                                                                                                        | Position (eV)                    | FWHM (eV)                 |
|--------------------------------------------------------------------------------------------------|----------------------------------|--------------------------|--------------------------------------------------------------------------------------------------------------------|----------------------------------|---------------------------|
| MgO<br>2p                                                                                        | 50.8                             | 1.7                      | ZnO<br>2p <sub>3/2</sub>                                                                                           | 1022.7                           | 1.8                       |
| RuO <sub>2</sub><br>3d <sub>5/2</sub>                                                            | 280.7                            | 1.8                      | TiO <sub>2</sub><br>2p <sub>3/2</sub><br>2p <sub>1/2</sub>                                                         | 458.9<br>464.6                   | 1.3<br>2.3                |
| Al <sub>2</sub> O <sub>3</sub><br>2p                                                             | 74.6                             | 1.8                      | Fe <sub>2</sub> O <sub>3</sub><br>2p <sub>3/2</sub><br>shake-up<br>2p <sub>1/2</sub><br>shake-up                   | 711.2<br>718.6<br>724.9<br>728.2 | 2.8<br>5.1<br>4.0<br>13.3 |
| CeO <sub>2</sub><br>3d <sub>3/2</sub>                                                            | 916.5                            | 4.4                      |                                                                                                                    |                                  |                           |
| MnO <sub>2</sub><br>2p <sub>3/2</sub><br>shake-up<br>2p <sub>1/2</sub><br>shake-up               | 642.2<br>645.6<br>654.0<br>655.3 | 2.7<br>5.5<br>2.5<br>9.1 | NiO<br>2p <sub>3/2</sub><br>shake-up<br>2p <sub>1/2</sub><br>shake-up                                              | 856.7<br>861.6<br>874.3<br>880.0 | 2.0<br>7.8<br>2.6<br>6.9  |
| Co <sub>3</sub> O <sub>4</sub><br>2p <sub>3/2</sub><br>shake-up<br>2p <sub>1/2</sub><br>shake-up | 781.7<br>786.2<br>797.2<br>802.9 | 2.7<br>8.1<br>3.5<br>7.2 | Ce <sub>2</sub> O <sub>3</sub><br>3d <sub>5/2</sub><br>3d <sub>5/2</sub><br>3d <sub>3/2</sub><br>3d <sub>3/2</sub> | 882.0<br>885.8<br>900.0<br>904.2 | 3.0<br>3.9<br>3.5<br>5.2  |
| CuO<br>2p <sub>3/2</sub><br>shake-up<br>2p <sub>1/2</sub><br>shake-up                            | 932.9<br>942.4<br>952.6<br>962.4 | 1.3<br>5.9<br>1.8<br>3.7 | ZrO <sub>2</sub><br>3d <sub>5/2</sub><br>3d <sub>3/2</sub>                                                         | 182.7<br>185                     | 1.4<br>1.5                |
| Cu(OH) <sub>2</sub><br>2p <sub>3/2</sub><br>2p <sub>1/2</sub>                                    | 934.7<br>954.6                   | 3.7<br>3.1               | SnO <sub>2</sub><br>3d <sub>5/2</sub><br>3d <sub>3/2</sub>                                                         | 487.3<br>495.7                   | 1.4<br>1.4                |

XPS data were fit using CasaXPS to determine peak positions and FWHM. Metal oxide signatures were evident in all spectra. No evidence of precursor salts or metals was noted.

### Titania Loading

By comparing the PEO cylinder volume ( $V_{PEO}$ ) to the  $TiO_2$  volume ( $V_{TiO_2}$ ), a loading ratio can be calculated. The measured height of titania dots, which has a density ( $\rho_{TiO_2}$ ) and formula weight ( $FW_{TiO_2}$ ), was  $5.4 \pm 1.4$  nm when using PS-*b*-PEO films, which had a PEO density ( $\rho_{PEO}$ ) and monomer formula weight ( $FW_{PEO \text{ unit}}$ ), that were 30 nm thick. PEO cylinders and  $TiO_2$  radii were  $8.7 \pm 0.8$  nm and  $8.5 \pm 1.9$  nm, respectively.

$$\left( \frac{\text{mol}_{Ti}}{\text{mol}_{PEO \text{ unit}}} \right) = \left( \frac{V_{TiO_2} \cdot \rho_{TiO_2}}{FW_{TiO_2}} \right) \left( \frac{FW_{PEO \text{ unit}}}{V_{PEO} \cdot \rho_{PEO}} \right) \quad (S1)$$

$$\left( \frac{\text{mol}_{Ti}}{\text{mol}_{PEO \text{ unit}}} \right) = \left( \frac{1.3 \times 10^{-24} \text{ m}^3 \cdot 4230 \text{ kg} \cdot \text{m}^{-3}}{0.079 \text{ kg} \cdot \text{mol}^{-1}} \right) \cdot \left( \frac{0.044 \text{ kg} \cdot \text{mol}^{-1}}{7.1 \times 10^{-24} \text{ m}^3 \cdot 1130 \text{ kg} \cdot \text{m}^{-3}} \right) \quad (S2)$$

$$\left( \frac{\text{mol}_{Ti}}{\text{mol}_{PEO \text{ unit}}} \right) = 0.38 \quad (S3)$$

The loading ratio ( $\text{mol}_{Ti}:\text{mol}_{PEO \text{ unit}} = 0.38$ ) is less than traditional EISA methods, which can reach up to 2 by employing micelles. However, loading ratios by the SPICE method should be compared to work by Shan *et al.*; they achieved well-ordered arrays by complexing precursors with homopolymers prior to blending with a BCP solution.<sup>1</sup> The reported loading ratios were 0.18-0.30; however, the ratios were calculated based on the homopolymer solution and not the final precursor/homopolymer/BCP solution. In the case of the latter, the loading ratios would have been closer to 0.12-0.20. Therefore, the SPICE method uses relatively large precursor loading ratios and thus minimizes consumed polymer material.

## Methylene Blue Catalysis

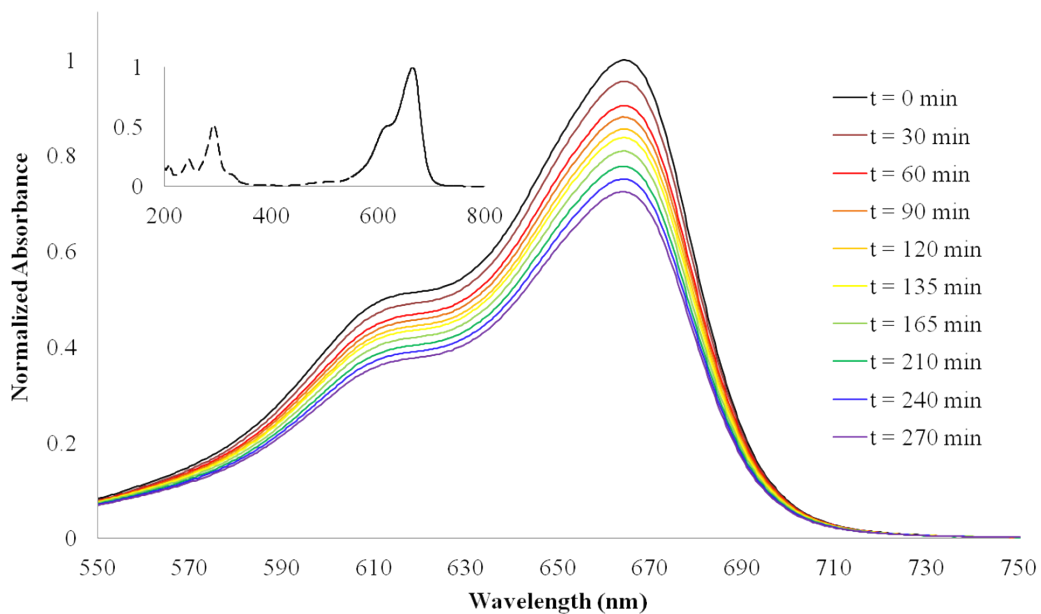

**Figure S2.** Representative time-lapse UV-vis spectra of MB photocatalytically degraded by SPICE TiO<sub>2</sub>. MB solutions were exposed to catalyst and UV irradiation in UV-transparent cuvettes. Inset contains the entire UV-vis spectra of a MB aqueous solution. The peaks between 550-740 nm (solid) were used to evaluate the photocatalytic activity of SPICE TiO<sub>2</sub>, EISA TiO<sub>2</sub>, and Au/SPICE-TiO<sub>2</sub> Au/EISA-TiO<sub>2</sub> surfaces.

MB was used to demonstrate the improved photocatalytic activity of SPICE TiO<sub>2</sub> over traditional EISA TiO<sub>2</sub>. The peaks between 550-750 nm were used to monitor the photocatalytic degradation of MB. Instrument drift was monitored by analyzing a stock MB solution that was not exposed to UV irradiation (Figure S2 inset) prior to each measurement. Time-lapse data clearly exhibit decreases in peak intensity. MB solution concentrations, which were based on integrated peak areas, were fit to first-order kinetics to determine rate constants (Figure 3). By monitoring the UV-vis spectra, it was shown that SPICE TiO<sub>2</sub> was 13% more effective than EISA TiO<sub>2</sub>.



## TiO<sub>2</sub> Dispersion

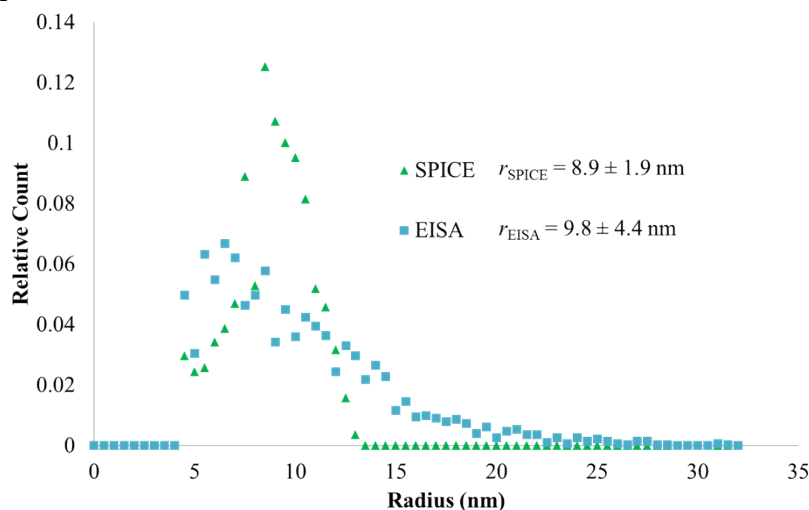

**Figure S3.** Size distributions of EISA and SPICE TiO<sub>2</sub> were measured according to the AFM images in Figure 1c and Figure 1d, respectively. Radii were calculated using ImageJ and binned in 0.5 nm increments. Counts (y-axis) were normalized for the purposes of comparison. Radii ( $r_x$ ) represent the average and standard deviation of each data set. The data represent over 2700 measurements for each AFM image.

The SPICE method produced a narrower distribution of TiO<sub>2</sub> than the EISA method. The narrower distribution was qualitatively evident by the line scan in Figure 1f, but it is quantified here. The variance ( $\sigma$ ) within the distribution of radii were  $\sigma_{\text{SPICE}} = 3.5$  nm and  $\sigma_{\text{EISA}} = 19.6$  nm.

The index of dispersion ( $D$ ) was calculated by the following expression:

$$D = \frac{\sigma^2}{\mu}, \quad (\text{S4})$$

for which  $\mu$  is the number average of the distribution. The indices of dispersion were  $D_{\text{SPICE}} = 1.5$  nm and  $D_{\text{EISA}} = 39.2$  nm. This narrower size distribution is one of the key benefits of the SPICE method over the traditional EISA method.

1. Shan, L.; Punniyakoti, S.; Van Bael, M. J.; Temst, K.; Van Bael, M. K.; Ke, X.; Bals, S.; Van Tendeloo, G.; D'Olieslaeger, M.; Wagner, P.; Haenen, K.; Boyen, H.-G.; *J. Mater. Chem. C* **2014**, *2*, 701-707.
